# Supplementary material
Source: bioRxiv or medRxiv preprint supplement (https://medrxiv.org/highwire/filestream/93735/field_highwire_adjunct_files/2/2020.08.18.20176743-3.pdf)
Supplement: Supplementary file [file 2020.08.18.20176743-3.pdf]

**New Number  
Hospitalized**

**Spike IgG serum AMC (cu Spike IgA UP Milk**

|   |        |        |
|---|--------|--------|
| 1 | 1,003  | 0,6805 |
| 2 | 0,4775 | 0,727  |
| 3 | 0,8845 | 0,9375 |

**PCR confirmed cases**

|    |        |        |
|----|--------|--------|
| 4  | 0,6295 | 1,0115 |
| 5  | 0,348  | 0,4965 |
| 6  | 0,1715 | 0,7805 |
| 7  | 0,39   | 0,438  |
| 8  | 0,369  | 0,6685 |
| 9  | 0,3085 | 0,0565 |
| 10 | 0,195  | 0,151  |
| 11 | 0,186  | 0,2205 |
| 12 | 0,284  | 0,457  |
| 13 | 0,5205 | 1,3025 |
| 14 | 0,4485 | 1,0875 |
| 15 | 0,6235 | 0,604  |
| 16 | 0,5105 | 0,98   |
| 17 | 0,447  | 0,8695 |
| 18 | 0,248  | 0,4685 |
| 19 | 0,39   | 0,5755 |
| 20 | 0,134  | 0,388  |
| 21 | 0,147  | 0,47   |
| 22 | 0,1195 | 0,761  |
| 23 | 0,245  | 0,567  |
| 24 | 0,165  | 0,38   |
| 25 | 0,117  | 1,0375 |
| 26 | NA     | 0,7795 |
| 27 | 0,523  | 0,53   |
| 28 | 0,534  | 1,2445 |
| 29 | 0,315  | 1,4485 |

|    |        |        |
|----|--------|--------|
| 30 | 0,0755 | 0,186  |
| 31 | 0,132  | 0,328  |
| 32 | 0,447  | 0,4705 |
| 33 | 0,0865 | 1,032  |
| 34 | 0,21   | 0,4615 |
| 35 | 0,704  | 0,6945 |
| 36 | 0,6255 | 0,761  |
| 37 | 0,076  | 0,311  |
| 38 | 0,075  | 0,3365 |

|    |        |        |
|----|--------|--------|
| 39 | 0,086  | 0,226  |
| 40 | 0,084  | 0,352  |
| 41 | 0,067  | 0,354  |
| 42 | 0,0875 | 0,4815 |

|    |        |        |
|----|--------|--------|
| 43 | 0,077  | 0,3475 |
| 44 | 0,068  | 0,2245 |
| 45 | 0,073  | 0,1895 |
| 46 | 0,073  | 0,3005 |
| 47 | 0,081  | 0,3105 |
| 48 | 0,059  | 0,2685 |
| 49 | 0,064  | 0,337  |
| 50 | 0,072  | 0,1665 |
| 51 | 0,0815 | 0,2565 |

**Spike IgA HoP Milk AMC**

**Spike IgA HPP**

**NP-Ab Serum**

|        |        |             |
|--------|--------|-------------|
| 0,7395 | 0,615  | 2,90787949  |
| 0,6025 | 0,657  | 4,866743917 |
| 0,9285 | 1,0415 | 1,266570104 |

|        |        |             |
|--------|--------|-------------|
| 1,0165 | 1,0065 | 0,166666667 |
| 0,574  | 0,513  | 0,259154114 |
| 0,6955 | 0,755  | 0,603476246 |
| 0,6155 | 0,5445 | 1,439339513 |
| 0,76   | 0,7005 | 1,891946698 |
| 0,0655 | 0,0525 | 1,412572422 |
| 0,09   | 0,095  | 0,093333333 |
| 0,1925 | 0,197  | 1,545191194 |

|        |          |             |
|--------|----------|-------------|
| 0,901  | 0,59     | 1,777578216 |
| 1,0745 | 1,105    | 1,767844728 |
| 1,0025 | 0,9715   | 4,866743917 |
| 0,6885 | 0,5515   | 1,189918888 |
| 0,9335 | 0,717    | 1,607242178 |
| 0,854  | 0,788    | 0,815179606 |
| 0,5065 | 0,4875   | 2,730243337 |
| 0,447  | 0,459    | 0,95631518  |
| 0,472  | 0,4195   | 0,222653534 |
| 0,453  | 0,3845   | 1,000115875 |
| 0,3025 | 0,658    | 2,32995365  |
| 0,643  | 0,5595   | 0,660660487 |
| 0,375  | 0,3025   | 0,951448436 |
| 1,1505 | 1,2015   | 0,767728853 |
| 0,638  | 0,696 NA |             |
| 0,5235 | 0,683    | 3,058748552 |
| 0,967  | 0,986    | 3,294785632 |
| 1,474  | 1,379    | 3,17433372  |

|        |        |             |
|--------|--------|-------------|
| 0,2565 | 0,158  | 0,064484357 |
| 0,3795 | 0,226  | 0,154166667 |
| 0,531  | 0,33   | 0,154166667 |
| 0,9895 | 1,1395 | 0,345538818 |
| 0,493  | 0,399  | 2,407821553 |
| 0,728  | 0,5795 | 2,168134415 |
| 0,74   | 0,754  | 1,489223638 |
| 0,286  | 0,233  | 0,063267671 |
| 0,54   | 0,4345 | 0,054750869 |

|    |    |             |
|----|----|-------------|
| NA | NA | 0,051100811 |
| NA | NA | 0,049884125 |
| NA | NA | 0,036500579 |
| NA | NA | 0,041367323 |

|    |    |             |
|----|----|-------------|
| NA | NA | 0,049884125 |
| NA | NA | 0,524391657 |
| NA | NA | 0,054750869 |
| NA | NA | 0,063267671 |
| NA | NA | 0,040150637 |
| NA | NA | 0,057184241 |
| NA | NA | 0,154166667 |
| NA | NA | 0,065701043 |
| NA | NA | 0,052317497 |

## RBD-Ab serum

## RBD-IgG serum

## Neutralization titer serum

|             |    |       |      |
|-------------|----|-------|------|
| 5,208333333 |    | 3,017 | 56.6 |
| 5,208333333 |    | 2,574 | 23.8 |
| 5,208333333 |    | 3     | 56.6 |
| 2,670572917 |    | 2,936 | <=20 |
| 1,069010417 |    | 1,01  | <=20 |
| 0,885416667 |    | 0,323 | <=20 |
| 3,356770833 |    | 0,992 | <=20 |
| 1,28125     |    | 0,672 | <=20 |
| 5,208333333 |    | 1,727 | <=20 |
| 1,533854167 |    | 0,773 | <=20 |
| 0,72265625  |    | 0,481 | <=20 |
| 1,92578125  |    | 1,332 | <=20 |
| 3,21484375  |    | 2,016 | <=20 |
| 5,208333333 |    | 1,793 | <=20 |
| 0,44921875  |    | 1,069 | <=20 |
| 3,51171875  |    | 1,819 | <=20 |
| 1,962239583 |    | 1,855 | <=20 |
| 3,830729167 |    | 1,085 | 23.8 |
| 3,083333333 |    | 1,17  | <=20 |
| 0,610677083 |    | 0,261 | <=20 |
| 2,666666667 |    | 0,994 | <=20 |
| 2,16015625  |    | 1,162 | <=20 |
| 0,7578125   |    | 1,005 | <=20 |
| 2,809895833 |    | 1,032 | <=20 |
| 1,2734375   |    | 0,709 | <=20 |
| NA          | NA |       | N/A  |
| 5,208333333 |    | 0,862 | <=20 |
| 4,009114583 |    | 1,854 | 28.3 |
| 5,208333333 |    | 1,8   | <=20 |
| 0,055989583 |    | 0,171 | <=20 |
| 0,442708333 |    | 0,322 | <=20 |
| 5,208333333 |    | 1,576 | <=20 |
| 0,89453125  |    | 0,692 | <=20 |
| 5,208333333 |    | 1,633 | <=20 |
| 5,208333333 |    | 1,841 | <=20 |
| 5,208333333 |    | 1,926 | <=20 |
| 0,055989583 |    | 0,301 | <=20 |
| 0,055989583 |    | 0,085 | <=20 |
| 0,065104167 |    | 0,135 | <=20 |
| 0,05078125  |    | 0,14  | <=20 |
| 0,049479167 |    | 0,123 | <=20 |
| 0,05078125  |    | 0,111 | <=20 |

|             |       |      |
|-------------|-------|------|
| 0,048177083 | 0,146 | <=20 |
| 0,7265625   | 0,415 | <=20 |
| 0,059895833 | 0,078 | <=20 |
| 0,0859375   | 0,096 | <=20 |
| 0,04296875  | 0,089 | <=20 |
| 0,048177083 | 0,096 | <=20 |
| 0,049479167 | 0,166 | <=20 |
| 0,041666667 | 0,128 | <=20 |
| 0,053385417 | 0,12  | <=20 |





**Neutralization titer HPP Milk**

33,5

<=20

23,8

23,8

<=20

23,8  
23,8  
23,8

<=20

<=20

<=20

<=20

<=20

28,3

<=20

<=20

<=20

<=20

<=20

<=20

<=20

<=20

<=20

<=20

<=20

<=20

<=20

<=20

<=20

<=20

<=20

<=20

<=20

<=20

23,8

<=20

<=20

<=20

NA

NA

NA

NA

NA  
NA  
NA  
NA  
NA  
NA  
NA  
NA  
NA
